# Supplementary material for: Genomic surveillance of SARS-CoV-2 in the state of Paraná, Southern Brazil, reveals the cocirculation of the VOC P.1, P.1-like-II lineage and a P.1 cluster harboring the S:E661D mutation
Source: bioRxiv or medRxiv preprint supplement (doi:10.1101/2021.07.14.21260508), 2021-07-15
Supplement: Supplementary file [file media-1.pdf]

## Supplementary material

Genomic surveillance of SARS-CoV-2 in the state of Paraná, Southern Brazil, reveals the cocirculation of the VOC P.1, P.1-like-II lineage and a P.1 cluster harboring the S:E661D mutation.

<sup>1</sup>Mauro de Medeiros Oliveira\*, <sup>1</sup>Michelle Orane Schemberger\*, <sup>2</sup>Andreia Akemi Suzukawa\*, <sup>3</sup>Irina Nastassja Riediger, <sup>3</sup>Maria do Carmo Debur, <sup>3</sup>Guilherme Becker, <sup>4</sup>Paola Cristina Resende, <sup>5</sup>Tiago Gräf, <sup>6</sup>Eduardo Balsanelli, <sup>6</sup>Valter Antônio de Baura, <sup>6</sup>Emanuel Maltempi de Souza, <sup>6</sup>Fábio de Oliveira Pedrosa, <sup>7</sup>Lysangela Ronalte Alves, <sup>1</sup>Lucas Blanes, <sup>8</sup>Sheila Cristina Nardeli, <sup>2</sup>Alessandra De Melo Aguiar, <sup>8</sup>Letusa Albrecht, <sup>1</sup>Dalila Zanette, <sup>8</sup>Andréa Rodrigues Ávila, <sup>1</sup>Luis Gustavo Morello, <sup>1</sup>Fabricio Kleryton Marchini, <sup>9</sup>Hellen Geremias dos Santos, <sup>7</sup>Fabio Passetti, <sup>2</sup>Bruno Dallagiovanna, <sup>1</sup>Helisson Faoro<sup>+</sup>.

on behalf of Fiocruz COVID-19 Genomic Surveillance Network

\*These authors contributed equally

<sup>1</sup>Laboratório de Ciências e Tecnologias Aplicadas em Saúde, Instituto Carlos Chagas, FIOCRUZ, Curitiba, Paraná, Brazil.

<sup>2</sup>Laboratório de Biologia Básica de Células Tronco, Instituto Carlos Chagas, FIOCRUZ, Curitiba, Paraná, Brazil.

<sup>3</sup>Laboratório Central do Estado do Paraná, LACEN, Curitiba, Paraná, Brazil.

<sup>4</sup>Laboratórios de Vírus Respiratórios e do Sarampo (LVRS), Instituto Oswaldo Cruz, FIOCRUZ, Rio de Janeiro, Rio de Janeiro, Brazil.

<sup>5</sup>Instituto Gonçalo Moniz, FIOCRUZ, Salvador, Bahia, Brazil.

<sup>6</sup>Departamento de Bioquímica e Biologia Molecular, Universidade Federal do Paraná, Curitiba, Paraná, Brazil.

<sup>7</sup>Laboratório de Regulação da Expressão Gênica, Instituto Carlos Chagas, FIOCRUZ, Curitiba, Paraná, Brazil.

<sup>8</sup>Laboratório de Pesquisa em Apicomplexa, Carlos Chagas Institute, FIOCRUZ, Curitiba, Paraná, Brazil.

<sup>9</sup>Instituto Carlos Chagas, FIOCRUZ, Curitiba, Paraná, Brazil.

+ To whom correspondence should be addressed.

Helisson Faoro: helisson.faoro@fiocruz.br; hfaoro@gmail.com

Prof. Algacyr Munhoz Mader street, 3775, CIC, 81350-010 Curitiba/PR, Brasil.

Tel.: +55(41)3316-3230; Fax: +55(41)3316-3267

**Figure S1:** SARS-CoV-2 variants identified in Paraná state in April 2021.

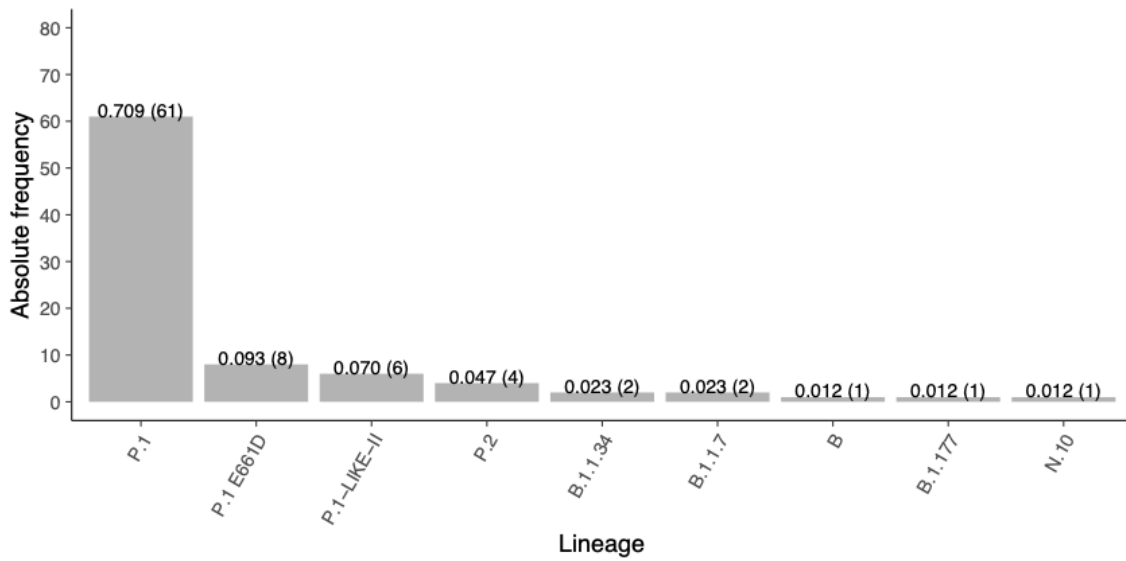

**Figure S2:** Distribution of SARS-CoV-2 variants identified in April 2021, according to macroregions of Paraná state.

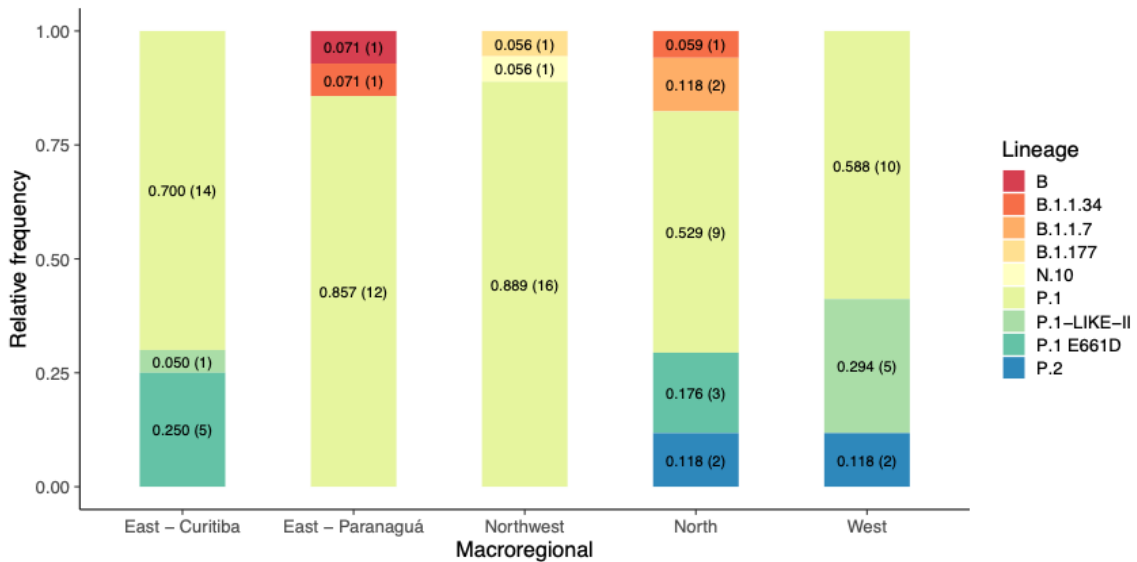

**Figure S3:** SARS-CoV-2 variants identified in Paraná state in April 2021 by age group.

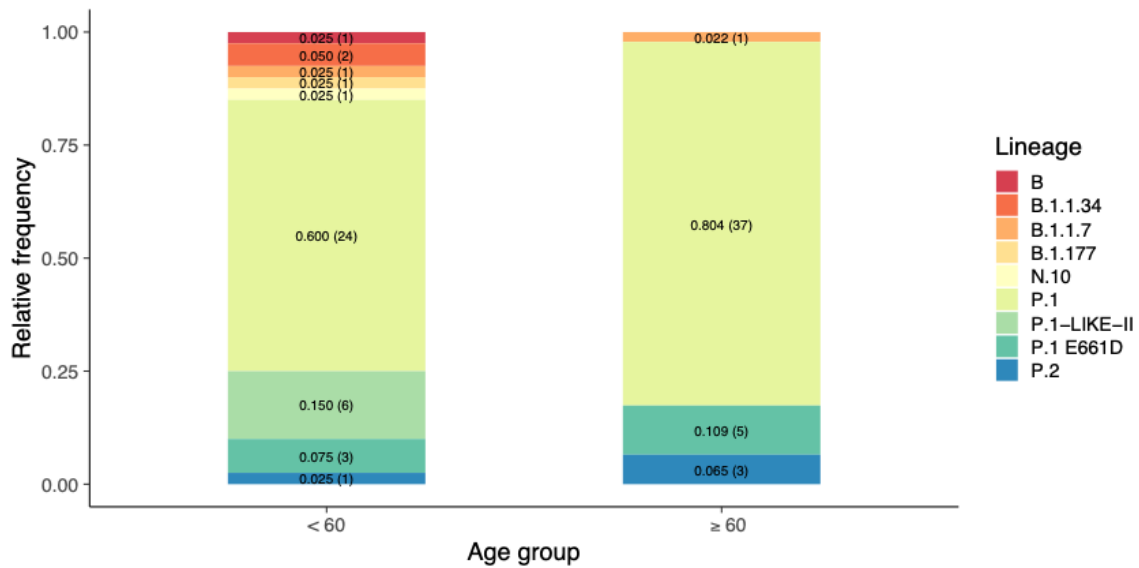

**Figure S4:** SARS-CoV-2 variants identified at Paraná state in April 2021 by clinical severity at the moment of sample collection (LAC: mild cases; LACEN: severe cases).

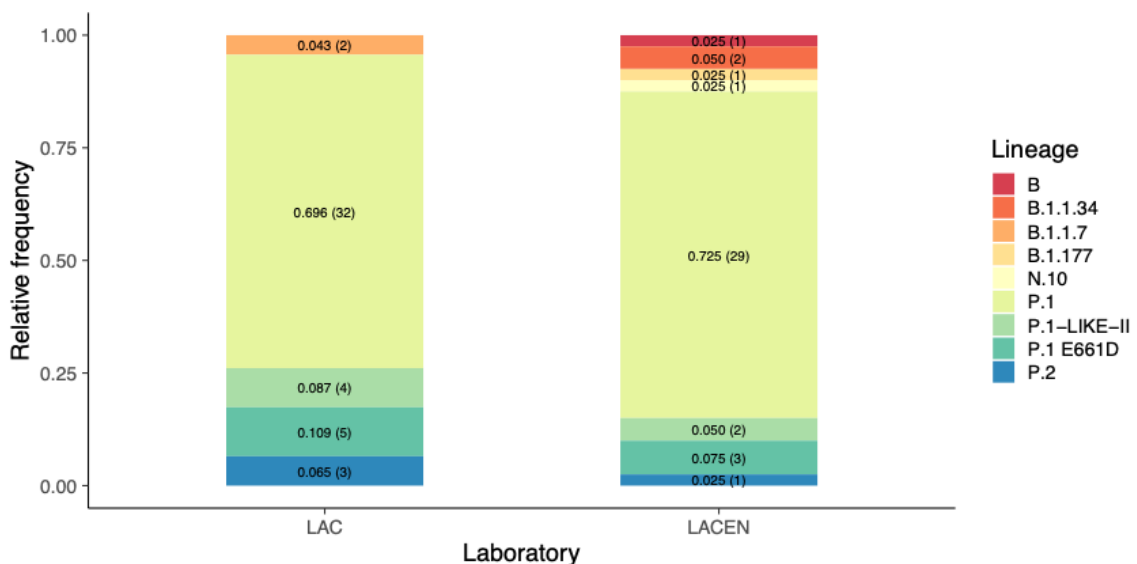

**List S1:** Number and source of SARS-CoV-2 genomes used in this study.

EPI\_ISL\_2775468, EPI\_ISL\_2775467, EPI\_ISL\_2775469, EPI\_ISL\_2775464,  
EPI\_ISL\_2775463, EPI\_ISL\_2775466, EPI\_ISL\_2775465, EPI\_ISL\_2775460,  
EPI\_ISL\_2775462, EPI\_ISL\_2775461, EPI\_ISL\_2775479, EPI\_ISL\_2775478,  
EPI\_ISL\_2775475, EPI\_ISL\_2775474, EPI\_ISL\_2775477, EPI\_ISL\_2775476,  
EPI\_ISL\_2775471, EPI\_ISL\_2775470, EPI\_ISL\_2775473, EPI\_ISL\_2775472,  
EPI\_ISL\_2775402, EPI\_ISL\_2775401, EPI\_ISL\_2775489, EPI\_ISL\_2775404,  
EPI\_ISL\_2775403, EPI\_ISL\_2775486, EPI\_ISL\_2775485, EPI\_ISL\_2775400,  
EPI\_ISL\_2775488, EPI\_ISL\_2775487, EPI\_ISL\_2775409, EPI\_ISL\_2775406,  
EPI\_ISL\_2775405, EPI\_ISL\_2775408, EPI\_ISL\_2775407, EPI\_ISL\_2775482,  
EPI\_ISL\_2775481, EPI\_ISL\_2775484, EPI\_ISL\_2775483, EPI\_ISL\_2775480,  
EPI\_ISL\_2775413, EPI\_ISL\_2775412, EPI\_ISL\_2775415, EPI\_ISL\_2775414,  
EPI\_ISL\_2775497, EPI\_ISL\_2775496, EPI\_ISL\_2775411, EPI\_ISL\_2775499,  
EPI\_ISL\_2775410, EPI\_ISL\_2775498, EPI\_ISL\_2775417, EPI\_ISL\_2775416,  
EPI\_ISL\_2775419, EPI\_ISL\_2775418, EPI\_ISL\_2775493, EPI\_ISL\_2775492,  
EPI\_ISL\_2775495, EPI\_ISL\_2775494, EPI\_ISL\_2775491, EPI\_ISL\_2775490,  
EPI\_ISL\_2775424, EPI\_ISL\_2775423, EPI\_ISL\_2775426, EPI\_ISL\_2775425,  
EPI\_ISL\_2775420, EPI\_ISL\_2775422, EPI\_ISL\_2775421, EPI\_ISL\_2775428,  
EPI\_ISL\_2775427, EPI\_ISL\_2775429, EPI\_ISL\_2775435, EPI\_ISL\_2775434,  
EPI\_ISL\_2775437, EPI\_ISL\_2775436, EPI\_ISL\_2775431, EPI\_ISL\_2775398,  
EPI\_ISL\_2775430, EPI\_ISL\_2775397, EPI\_ISL\_2775433, EPI\_ISL\_2775432,  
EPI\_ISL\_2775399, EPI\_ISL\_2775439, EPI\_ISL\_2775438, EPI\_ISL\_2775394,  
EPI\_ISL\_2775393, EPI\_ISL\_2775396, EPI\_ISL\_2775395, EPI\_ISL\_2775390,  
EPI\_ISL\_2775392, EPI\_ISL\_2775391, EPI\_ISL\_2775446, EPI\_ISL\_2775445,  
EPI\_ISL\_2775448, EPI\_ISL\_2775447, EPI\_ISL\_2775442, EPI\_ISL\_2775441,  
EPI\_ISL\_2775444, EPI\_ISL\_2775443, EPI\_ISL\_2775449, EPI\_ISL\_2775440,  
EPI\_ISL\_2775457, EPI\_ISL\_2775456, EPI\_ISL\_2775459, EPI\_ISL\_2775458,  
EPI\_ISL\_2775453, EPI\_ISL\_2775452, EPI\_ISL\_2775455, EPI\_ISL\_2775454,  
EPI\_ISL\_2775451, EPI\_ISL\_2775450, EPI\_ISL\_2758965, EPI\_ISL\_2758966,  
EPI\_ISL\_2758963, EPI\_ISL\_2759018, EPI\_ISL\_2758964, EPI\_ISL\_2759019,  
EPI\_ISL\_2758969, EPI\_ISL\_2758967, EPI\_ISL\_2758968, EPI\_ISL\_2759012,  
EPI\_ISL\_2759013, EPI\_ISL\_2759010, EPI\_ISL\_2759011, EPI\_ISL\_2758961,  
EPI\_ISL\_2759016, EPI\_ISL\_2758962, EPI\_ISL\_2759017, EPI\_ISL\_2759014,  
EPI\_ISL\_2758960, EPI\_ISL\_2759015, EPI\_ISL\_2758954, EPI\_ISL\_2759009,

EPI\_ISL\_2758955, EPI\_ISL\_2758952, EPI\_ISL\_2759007, EPI\_ISL\_2758953,  
EPI\_ISL\_2759008, EPI\_ISL\_2758958, EPI\_ISL\_2758959, EPI\_ISL\_2758956,  
EPI\_ISL\_2758957, EPI\_ISL\_2759001, EPI\_ISL\_2759002, EPI\_ISL\_2759000,  
EPI\_ISL\_2758950, EPI\_ISL\_2759005, EPI\_ISL\_2758951, EPI\_ISL\_2759006,  
EPI\_ISL\_2759003, EPI\_ISL\_2759004, EPI\_ISL\_2758949, EPI\_ISL\_2758943,  
EPI\_ISL\_2758944, EPI\_ISL\_2758941, EPI\_ISL\_2758942, EPI\_ISL\_2758947,  
EPI\_ISL\_2758948, EPI\_ISL\_2758945, EPI\_ISL\_2758946, EPI\_ISL\_2758940,  
EPI\_ISL\_2759070, EPI\_ISL\_2759071, EPI\_ISL\_2758938, EPI\_ISL\_2758939,  
EPI\_ISL\_2759067, EPI\_ISL\_2759068, EPI\_ISL\_2759065, EPI\_ISL\_2759066,  
EPI\_ISL\_2759069, EPI\_ISL\_2759060, EPI\_ISL\_2759063, EPI\_ISL\_2759064,  
EPI\_ISL\_2759061, EPI\_ISL\_2759062, EPI\_ISL\_2759056, EPI\_ISL\_2759057,  
EPI\_ISL\_2759054, EPI\_ISL\_2759055, EPI\_ISL\_2759058, EPI\_ISL\_2759059,  
EPI\_ISL\_2759052, EPI\_ISL\_2759053, EPI\_ISL\_2759050, EPI\_ISL\_2759051,  
EPI\_ISL\_2758998, EPI\_ISL\_2758999, EPI\_ISL\_2758996, EPI\_ISL\_2758997,  
EPI\_ISL\_2758990, EPI\_ISL\_2759045, EPI\_ISL\_2758991, EPI\_ISL\_2759046,  
EPI\_ISL\_2759043, EPI\_ISL\_2759044, EPI\_ISL\_2758994, EPI\_ISL\_2759049,  
EPI\_ISL\_2758995, EPI\_ISL\_2758992, EPI\_ISL\_2759047, EPI\_ISL\_2758993,  
EPI\_ISL\_2759048, EPI\_ISL\_2759041, EPI\_ISL\_2759042, EPI\_ISL\_2759040,  
EPI\_ISL\_2758987, EPI\_ISL\_2758988, EPI\_ISL\_2758985, EPI\_ISL\_2758986,  
EPI\_ISL\_2758989, EPI\_ISL\_2759034, EPI\_ISL\_2758980, EPI\_ISL\_2759035,  
EPI\_ISL\_2759032, EPI\_ISL\_2759033, EPI\_ISL\_2758983, EPI\_ISL\_2759038,  
EPI\_ISL\_2758984, EPI\_ISL\_2759039, EPI\_ISL\_2758981, EPI\_ISL\_2759036,  
EPI\_ISL\_2758982, EPI\_ISL\_2759037, EPI\_ISL\_2759030, EPI\_ISL\_2759031,  
EPI\_ISL\_2758976, EPI\_ISL\_2758977, EPI\_ISL\_2758974, EPI\_ISL\_2759029,  
EPI\_ISL\_2758975, EPI\_ISL\_2758978, EPI\_ISL\_2758979, EPI\_ISL\_2759023,  
EPI\_ISL\_2759024, EPI\_ISL\_2759021, EPI\_ISL\_2759022, EPI\_ISL\_2758972,  
EPI\_ISL\_2759027, EPI\_ISL\_2758973, EPI\_ISL\_2759028, EPI\_ISL\_2758970,  
EPI\_ISL\_2759025, EPI\_ISL\_2758971, EPI\_ISL\_2759026, EPI\_ISL\_2759020.

**Table S1:** Nonsynonymous mutations described for VOIs N.10-PR, N.10-MA and B.1.429.

| Protein | VOI          |              |                   |
|---------|--------------|--------------|-------------------|
|         | N.10-PR      | N.10-MA      | B.1.429 (CAL.20C) |
| S       | S:P9L        | S:P9L        | -                 |
|         | -            | -            | S:S13I            |
|         | S:W152C      | -            | S:W152C           |
|         | S:I210V      | S:I210V      | -                 |
|         | S:N211I      | S:N211I      | -                 |
|         | S:V445A      | S:V445A      | -                 |
|         | -            | -            | S:L452R           |
|         | S:E484K      | S:E484K      | -                 |
|         | S:D614G      | S:D614G      | S:D614G           |
| ORF1a   | ORF1a:H712Y  | -            | -                 |
|         | ORF1a:P1640L | ORF1a:P1640L | -                 |
|         | ORF1a:P3371S | ORF1a:P3371S | -                 |
|         | ORF1a:P3395S | ORF1a:P3395S | -                 |
|         | ORF1a:V3718A | ORF1a:V3718A | -                 |
| -       | -            | -            | ORF1a:I4205V      |
| N       | N:Q70R       | N:Q70R       | -                 |
|         | N:R203K      | N:R203K      | -                 |
|         | N:G204R      | N:G204R      | -                 |
|         | N:I292T      | N:I292T      | -                 |
| ORF1b   | ORF1b:P314L  | ORF1b:P314L  | -                 |
| ORF6    | ORF6:I33T    | ORF6:I33T    | -                 |
| ORF7b   | ORF7b:F13X   | ORF7b:F13X   | -                 |
| ORF9b   | ORF9b:K67E   | ORF9b:K67E   | -                 |
